# Supplementary material for: Synthesis and structure of a series of new luminescent Ag–Ln coordination polymers and the influence of the introduction of an Ag(i) ion on NIR luminescence from the Ln(iii) centre
Source: Royal Society of Chemistry journal article supplement (doi:10.1039/b9nj00565j), 2010-01-01
Supplement: b9nj00565j.pdf [file b9nj00565j.pdf]

## Supporting information to be published electronically

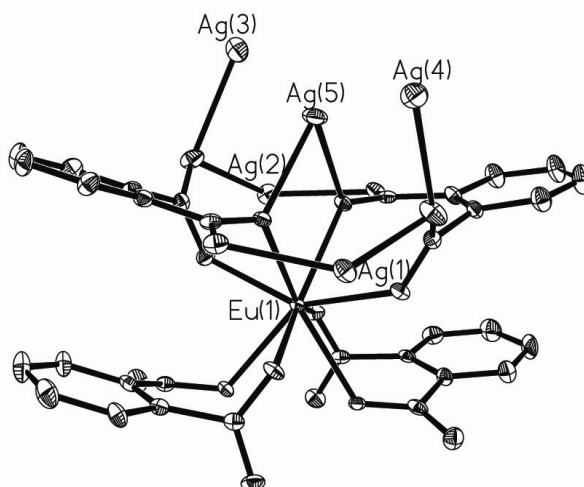

Fig. S1 The asymmetric unit of complex **1**. Thermal ellipsoid is of 30% probability.

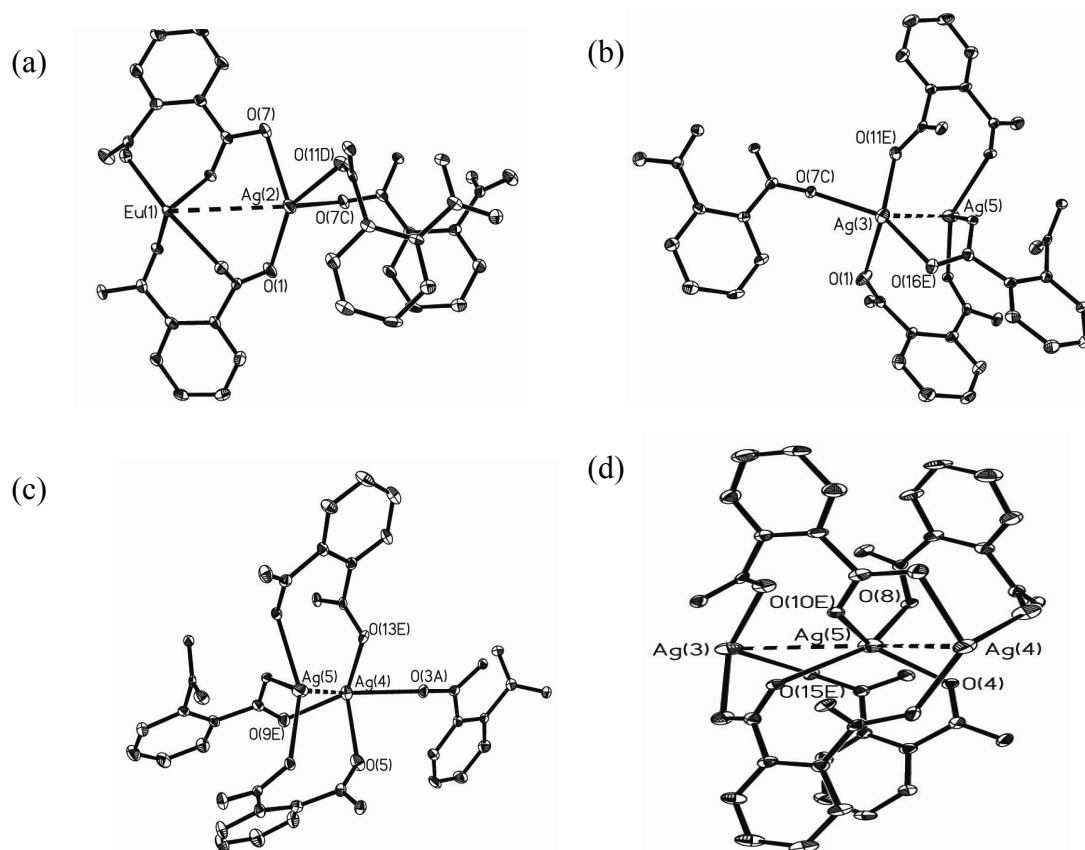

Fig. S2 The local coordination environment around Ag(I) ions in complex **1**.  
Thermal ellipsoid is of 30% probability.

If taking into the M...M interaction, the Ag(I) ion may be considered to be 5-coordinated or 6-coordinated. Thus, the coordination modes of five Ag(I) ions in complex **1** can be divided into three types: (a) the first one involves two Ag(I) ions (Ag(1) and Ag(2) ions) with four Ag-O bonds and one Eu...Ag interaction (Fig. 1b in the text and Fig. S2a); (b) the second one includes Ag(3) and Ag(4) ions with four Ag-O bonds and one Ag...Ag interaction (Fig. S2b and Fig. S2c); (c) the last one involves Ag(5) ion, which is 6-coordinated with four Ag-O bonds and two

Ag...Ag interacion(Fig. S2d).

Table S1. The selected bond lengths (Å) around Ln(III) and Ag(I) ions in complexes 1–4

| Complex  | Ln-O        |            | Ag-O                     |                          |                          |           |
|----------|-------------|------------|--------------------------|--------------------------|--------------------------|-----------|
| <b>1</b> | Eu(1)-O(12) | 2.337(4)   | Ag(1)-O(5)               | 2.302(4)                 | Ag(2)-O(1)               | 2.298(4)  |
|          | Eu(1)-O(6)  | 2.331(4)   | Ag(1)-O(13) <sup>a</sup> | 2.335(4)                 | Ag(2)-O(11) <sup>c</sup> | 2.317(4)  |
|          | Eu(1)-O(14) | 2.338(4)   | Ag(1)-O(3)               | 2.456(4)                 | Ag(2)-O(7)               | 2.472(4)  |
|          | Eu(1)-O(2)  | 2.334(4)   | Ag(1)-O(3) <sup>b</sup>  | 2.544(4)                 | Ag(2)-O(7) <sup>d</sup>  | 2.568(4)  |
|          | Eu(1)-O(15) | 2.428(4)   | Ag(3)-O(16) <sup>e</sup> | 2.345(4)                 | Ag(4)-O(9) <sup>e</sup>  | 2.383(4)  |
|          | Eu(1)-O(10) | 2.438(3)   | Ag(3)-O(11) <sup>e</sup> | 2.397(4)                 | Ag(4)-O(13) <sup>e</sup> | 2.397(4)  |
|          | Eu(1)-O(8)  | 2.440(4)   | Ag(3)-O(7) <sup>d</sup>  | 2.430(4)                 | Ag(4)-O(3) <sup>b</sup>  | 2.481(4)  |
|          | Eu(1)-O(4)  | 2.455(4)   | Ag(3)-O(1)               | 2.564(4)                 | Ag(4)-O(5)               | 2.486(4)  |
|          |             |            | Ag(5)-O(15) <sup>e</sup> | 2.397(4)                 | Ag(5)-O(4)               | 2.421(4)  |
|          |             | Ag(5)-O(8) | 2.403(3)                 | Ag(5)-O(10) <sup>e</sup> | 2.431(4)                 |           |
| <b>2</b> | Yb(1)-O(12) | 2.255(13)  | Ag(1)-O(5)               | 2.322(15)                | Ag(2)-O(1)               | 2.313(14) |
|          | Yb(1)-O(6)  | 2.238(14)  | Ag(1)-O(13) <sup>a</sup> | 2.337(12)                | Ag(2)-O(11) <sup>c</sup> | 2.309(13) |
|          | Yb(1)-O(14) | 2.256(12)  | Ag(1)-O(3)               | 2.442(14)                | Ag(2)-O(7)               | 2.456(15) |
|          | Yb(1)-O(2)  | 2.258(12)  | Ag(1)-O(3) <sup>b</sup>  | 2.561(13)                | Ag(2)-O(7) <sup>d</sup>  | 2.584(12) |
|          | Yb(1)-O(15) | 2.396(13)  | Ag(3)-O(16) <sup>e</sup> | 2.334(15)                | Ag(4)-O(13) <sup>e</sup> | 2.358(14) |
|          | Yb(1)-O(10) | 2.384(12)  | Ag(3)-O(11) <sup>e</sup> | 2.371(15)                | Ag(4)-O(9) <sup>e</sup>  | 2.392(15) |
|          | Yb(1)-O(8)  | 2.401(11)  | Ag(3)-O(7) <sup>d</sup>  | 2.448(13)                | Ag(4)-O(3) <sup>b</sup>  | 2.475(12) |
|          | Yb(1)-O(4)  | 2.405(11)  | Ag(3)-O(1)               | 2.553(14)                | Ag(4)-O(5)               | 2.483(14) |
|          |             |            | Ag(5)-O(15) <sup>e</sup> | 2.392(12)                | Ag(5)-O(4)               | 2.406(12) |
|          |             | Ag(5)-O(8) | 2.388(11)                | Ag(5)-O(10) <sup>e</sup> | 2.399(12)                |           |
| <b>3</b> | Er(1)-O(12) | 2.284(8)   | Ag(1)-O(5)               | 2.314(9)                 | Ag(2)-O(1)               | 2.310(10) |
|          | Er(1)-O(6)  | 2.283(8)   | Ag(1)-O(13) <sup>a</sup> | 2.332(9)                 | Ag(2)-O(11) <sup>c</sup> | 2.311(8)  |
|          | Er(1)-O(14) | 2.292(8)   | Ag(1)-O(3)               | 2.445(9)                 | Ag(2)-O(7)               | 2.453(9)  |
|          | Er(1)-O(2)  | 2.292(8)   | Ag(1)-O(3) <sup>b</sup>  | 2.555(9)                 | Ag(2)-O(7) <sup>d</sup>  | 2.572(9)  |
|          | Er(1)-O(15) | 2.397(7)   | Ag(3)-O(16) <sup>e</sup> | 2.327(10)                | Ag(4)-O(9) <sup>e</sup>  | 2.371(10) |
|          | Er(1)-O(10) | 2.415(8)   | Ag(3)-O(11) <sup>e</sup> | 2.397(9)                 | Ag(4)-O(13) <sup>e</sup> | 2.376(9)  |
|          | Er(1)-O(8)  | 2.423(8)   | Ag(3)-O(7) <sup>d</sup>  | 2.436(8)                 | Ag(4)-O(3) <sup>b</sup>  | 2.491(9)  |
|          | Er(1)-O(4)  | 2.424(8)   | Ag(3)-O(1)               | 2.567(10)                | Ag(4)-O(5)               | 2.495(10) |
|          |             |            | Ag(5)-O(15) <sup>e</sup> | 2.385(7)                 | Ag(5)-O(4)               | 2.418(8)  |
|          |             | Ag(5)-O(8) | 2.397(8)                 | Ag(5)-O(10) <sup>e</sup> | 2.408(7)                 |           |
| <b>4</b> | Ho(1)-O(12) | 2.280(9)   | Ag(1)-O(5)               | 2.305(10)                | Ag(2)-O(1)               | 2.311(9)  |
|          | Ho(1)-O(6)  | 2.282(9)   | Ag(1)-O(13) <sup>a</sup> | 2.322(9)                 | Ag(2)-O(11) <sup>c</sup> | 2.315(9)  |
|          | Ho(1)-O(14) | 2.305(9)   | Ag(1)-O(3)               | 2.453(10)                | Ag(2)-O(7)               | 2.462(10) |
|          | Ho(1)-O(2)  | 2.308(9)   | Ag(1)-O(3) <sup>b</sup>  | 2.544(10)                | Ag(2)-O(7) <sup>d</sup>  | 2.578(9)  |
|          | Ho(1)-O(15) | 2.390(9)   | Ag(3)-O(16) <sup>e</sup> | 2.333(10)                | Ag(4)-O(9) <sup>e</sup>  | 2.381(10) |
|          | Ho(1)-O(10) | 2.412(9)   | Ag(3)-O(11) <sup>e</sup> | 2.394(10)                | Ag(4)-O(13) <sup>e</sup> | 2.400(10) |
|          | Ho(1)-O(8)  | 2.414(8)   | Ag(3)-O(7) <sup>d</sup>  | 2.449(9)                 | Ag(4)-O(5)               | 2.502(10) |
|          | Ho(1)-O(4)  | 2.424(8)   | Ag(3)-O(1)               | 2.551(10)                | Ag(4)-O(3) <sup>b</sup>  | 2.505(10) |
|          |             |            | Ag(5)-O(15) <sup>e</sup> | 2.408(9)                 | Ag(5)-O(4)               | 2.410(8)  |
|          |             | Ag(5)-O(8) | 2.402(8)                 | Ag(5)-O(10) <sup>e</sup> | 2.421(9)                 |           |

Symmetry transformations used to generate equivalent atoms: <sup>a</sup> -x+1, -y, -z+1; <sup>b</sup> -x, -y, -z+1; <sup>c</sup> -x+1, -y+1, -z;

<sup>d</sup> -x, -y+1, -z; <sup>e</sup> x-1, y, z; <sup>f</sup> x+1, y, z.

Table S2 Structure data of four  $\text{bcd}^{2-}$  anions in each of complexes 1–4

| Coordination mode                                       | $\mu_7\text{-bcd}$ |      |      |      |      |      |      |      | $\mu_5\text{-bcd}$ |      |      |       |      |      |      |      |
|---------------------------------------------------------|--------------------|------|------|------|------|------|------|------|--------------------|------|------|-------|------|------|------|------|
|                                                         | 1                  |      | 2    |      | 3    |      | 4    |      | 1                  |      | 2    |       | 3    |      | 4    |      |
| Angle between two carboxyl planes/ $^\circ$             | 54.5               | 56.6 | 50.9 | 52.1 | 52.7 | 54.0 | 55.3 | 55.0 | 95.0               | 87.1 | 93.2 | 88.3  | 90.9 | 93.8 | 89.1 | 92.7 |
| Angle between carboxyl and benzene ring plane/ $^\circ$ | 14.9               | 12.2 | 15.7 | 12.6 | 15.1 | 11.7 | 14.5 | 12.4 | 17.9               | 12.7 | 17.9 | 14.7  | 12.6 | 17.6 | 14.0 | 17.6 |
|                                                         | 57.5               | 52.5 | 53.4 | 50.4 | 54.8 | 79.7 | 55.3 | 50.3 | 82.6               | 96.8 | 79.2 | 100.0 | 99.4 | 80.4 | 99.2 | 80.7 |

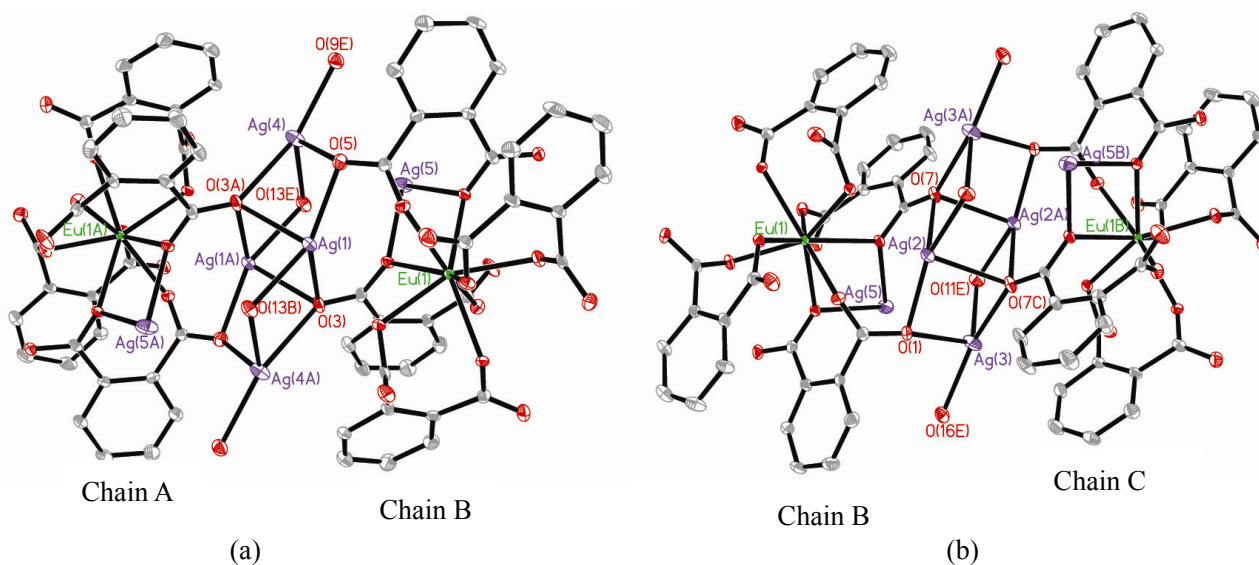

Fig. S3 The detail of interchain connection in complex 1: (a) connection through Ag(1) and Ag(4) ions coordinating to the  $\text{bcd}^{2-}$  anions from intrachain; (b) connection through Ag(2) and Ag(3) ions coordinating to the  $\text{bcd}^{2-}$  anions from intrachain. Thermal ellipsoid is of 30% probability.

Firstly, the adjacent chain A and B are linked by Ag(1) and Ag(4) ions, and chain B is further linked through Ag(2) and Ag(3) ions with chain C, then chain C is linked with chain A, ..... As a result, the repeated arrangement of chains ...ABCABCABC... appears in the direction of  $\bar{c}$ , which results in formation of the 2D layer.

Table S3. The separations of M...M ( $\text{\AA}$ ) in complexes 1–4

| Complex | 1         |          | 2         |          | 3         |          | 4         |          |
|---------|-----------|----------|-----------|----------|-----------|----------|-----------|----------|
| Ln...Ag | Eu...Ag1  | 3.730(2) | Yb...Ag1  | 3.708(3) | Er...Ag1  | 3.724(2) | Ho...Ag1  | 3.724(1) |
|         | Eu...Ag2  | 3.752(1) | Yb...Ag2  | 3.733(3) | Er...Ag2  | 3.746(2) | Ho...Ag2  | 3.749(2) |
| Ag...Ag | Ag3...Ag5 | 3.318(2) | Ag3...Ag5 | 3.297(3) | Ag3...Ag5 | 3.316(2) | Ag3...Ag5 | 3.312(3) |
|         | Ag4...Ag5 | 3.324(2) | Ag4...Ag5 | 3.296(3) | Ag4...Ag5 | 3.319(2) | Ag4...Ag5 | 3.319(3) |
|         | Ag1...Ag4 | 3.464(1) | Ag1...Ag4 | 3.432(2) | Ag1...Ag4 | 3.449(1) | Ag1...Ag4 | 3.448(2) |
|         | Ag2...Ag3 | 3.426(1) | Ag2...Ag3 | 3.398(2) | Ag2...Ag3 | 3.410(2) | Ag2...Ag3 | 3.410(2) |

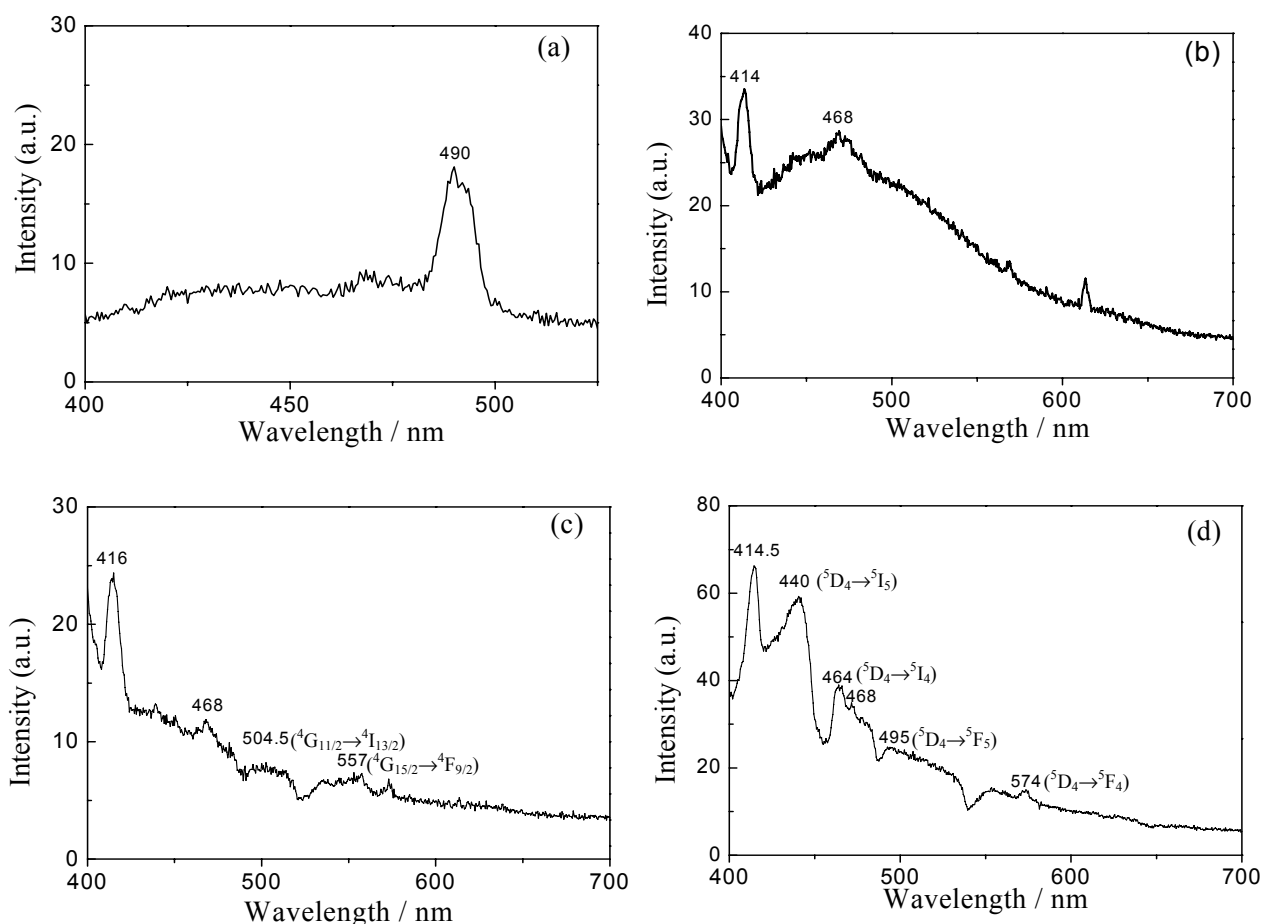

Fig. S4 The emission spectra of complex **1-4** in the visible region. (a) complex **1** (Eu-Ag),  $\lambda_{\text{ex}} = 298$  nm; (b) complex **2** (Yb-Ag),  $\lambda_{\text{ex}} = 380$  nm; (c) complex **3** (Er-Ag),  $\lambda_{\text{ex}} = 383$  nm; (d) complex **4** (Ho-Ag),  $\lambda_{\text{ex}} = 381.5$  nm.

With  $\lambda_{\text{ex}} = 298$  nm, the luminescence of ligand has been completely quenched and the emission of Ag-block shifts red ( $\lambda_{\text{max}} = 490$  nm) in complex **1** (Fig. S4a), which suggests that the energy transfer from ligand and Ag-block to Eu(III) ion take place effectively, *i.e.*, sensitization of ligand and Ag-block to Eu(III) ion. With  $\lambda_{\text{ex}} = 380$  nm, complex **2** exhibit two emission bands in the visible region (Fig. S4b). The one at 414 nm is assigned to the LLCT, and the other at 468 nm is attributed to LMCT of Ag-block because there is no emission peak at this position for the free ligand.<sup>a</sup> For complex **3** and **4**, except for the LLCT and LMCT transition, there present the *f-f* emission bands of corresponding Ln(III) ions in the visible region, but they are very weak (Fig. S4c and Fig. S4d). From the emission spectra of the complex **2-4**, we can find that emissions of ligand and Ag-block (Ag-ligand section) are observed, which suggests that the energy are mainly used as the luminescence of ligand and Ag-block and not effectively transferred to the Ln(III) ions.

<sup>a</sup> R. P. Feazell, C. E. Carson, and K. K. Klausmeyer, *Eur. J. Inorg. Chem.*, 2005, 3287; F. T. Xie, H. Y. Bie, L. M. Duan, G. H. li, X. Zhang, J. Q. Xu, *Solid State Chem.*, 2005, **178**, 2858.

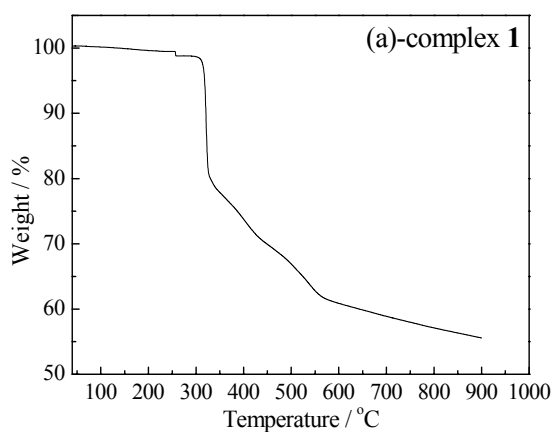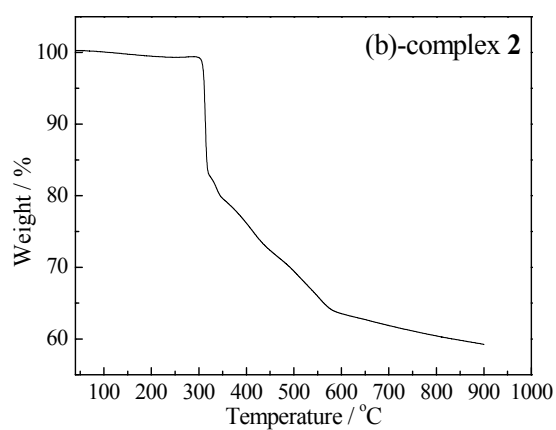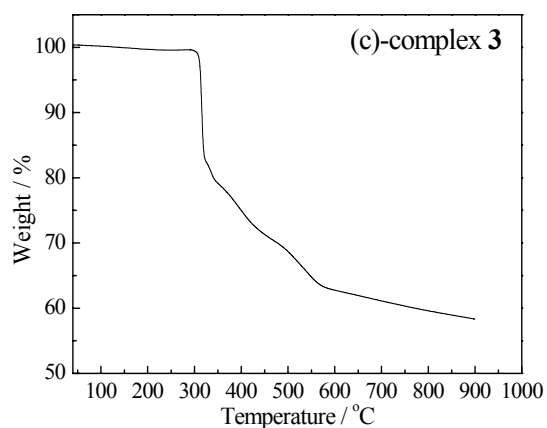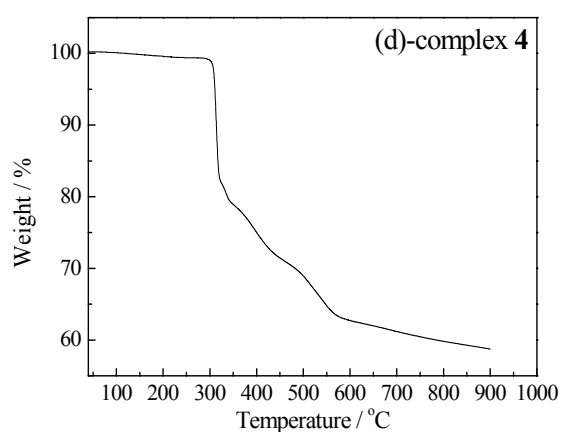

Fig. S5 The TG curves of complexes 1-4.

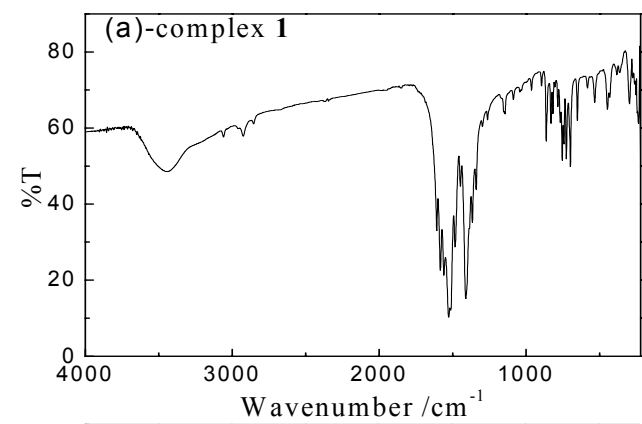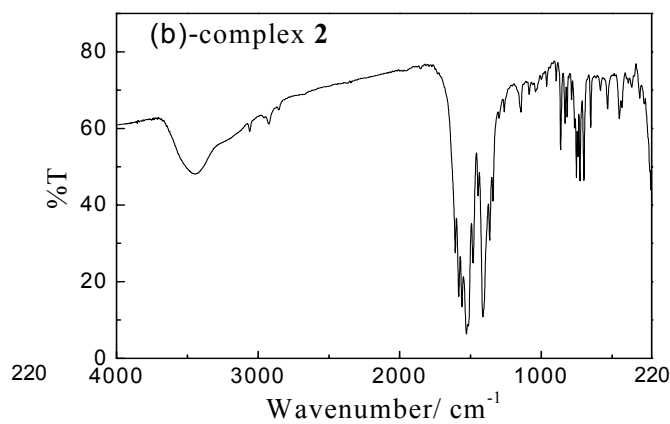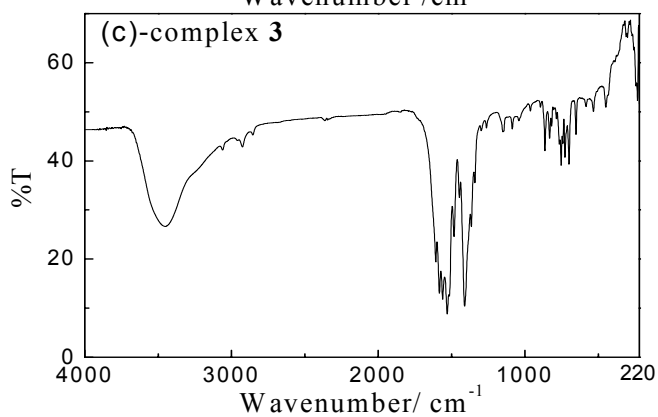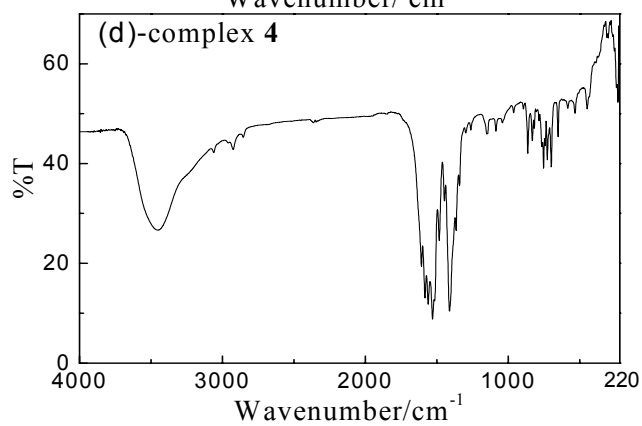

Fig. S6 The IR spectra of complexes 1-4
